# Supplementary material for: Ultrasensitive and selective colorimetric detection of acetamiprid pesticide based on the enhanced peroxidase-like activity of gold nanoparticles
Source: Royal Society of Chemistry journal article supplement (doi:10.1039/c7ay01451a), 2017-01-01
Supplement: c7ay01451a1.pdf [file c7ay01451a1.pdf]

# Ultrasensitive and selective colorimetric detection of acetamiprid pesticide based on the enhanced peroxidase-like activity of gold nanoparticles

Wenping Yang, Yuangen Wu\*, Han Tao, Jing Zhao, Huayun Chen, Shuyi Qiu

Guizhou Province Key Laboratory of Fermentation Engineering and Biopharmacy; School of Liquor and Food Engineering, Guizhou University, Guiyang, 550025, Guizhou Province, P. R. China. E-mail: wuyg1357@163.com.

## Electronic Supplementary Information

### Supplementary figures:

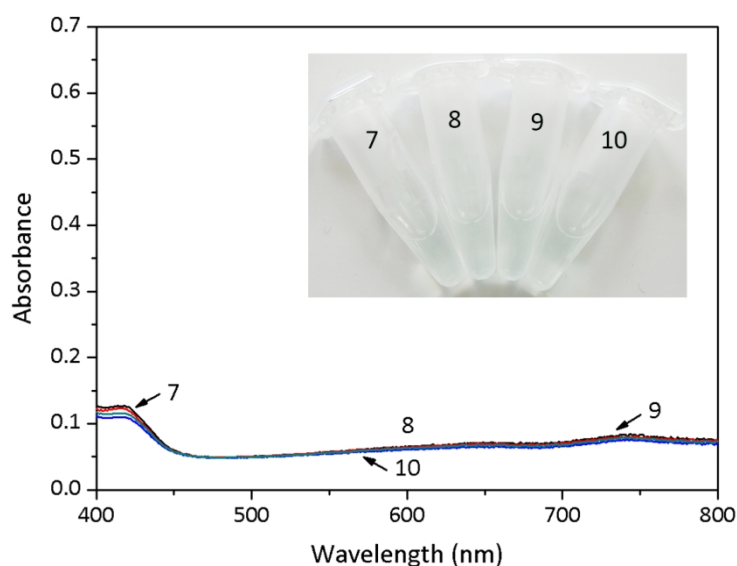

**Figure S1** Absorption spectra and colour of solutions contain different substances. Sample 7: ABTS + H<sub>2</sub>O<sub>2</sub>; Sample 8: S-18 aptamer + ABTS + H<sub>2</sub>O<sub>2</sub>; Sample 9: acetamiprid (200 µg/L) + ABTS + H<sub>2</sub>O<sub>2</sub>; Sample 10: S-18 aptamer + acetamiprid (200 µg/L) + ABTS + H<sub>2</sub>O<sub>2</sub>. The final concentration of S-18 aptamer is 10 nM.

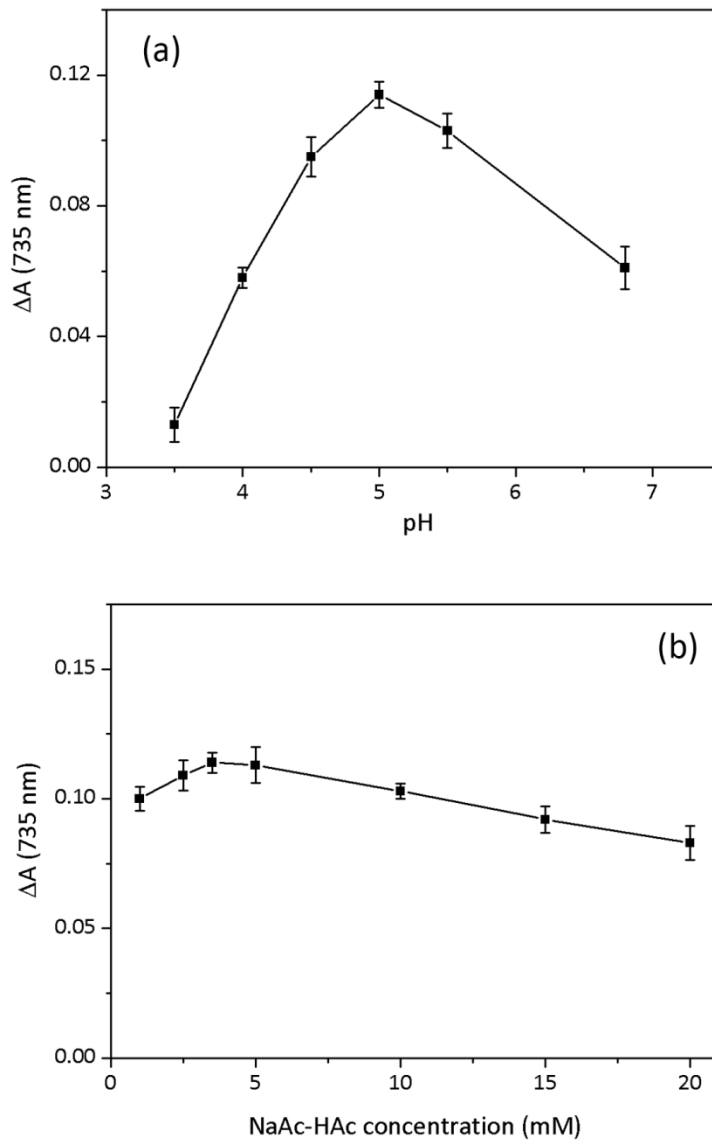

**Figure S2** Effects of pH (a) and NaAc-HAc concentrations (b) on the absorbance variations ( $\Delta A$ ) of present aptasensor for acetamiprid detection. Error bars shown represent the standard error derived from three repeated measurements.

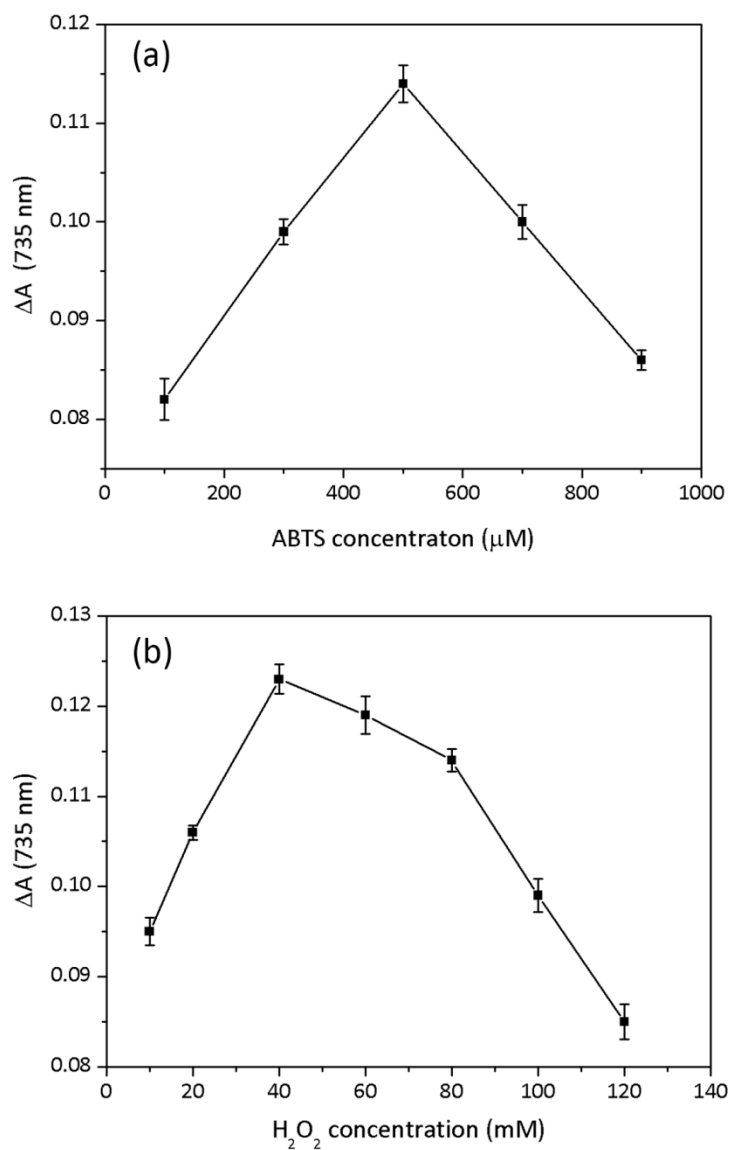

**Figure S3** Effect of the concentration of ABTS (a) and H<sub>2</sub>O<sub>2</sub> (b) on the absorbance variations ( $\Delta A$ ) of present aptasensor for acetamiprid detection. Error bars shown represent the standard error derived from three repeated measurements.

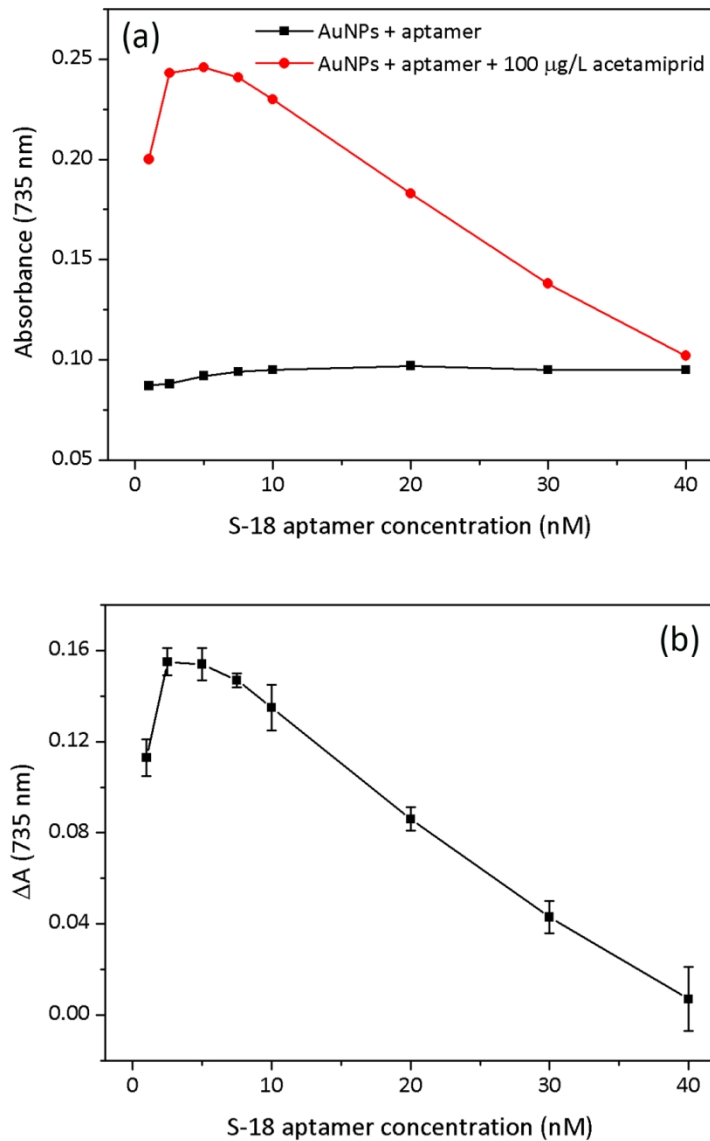

**Figure S4** (a) The absorbance value of sensing solutions with the increasing concentration of S-18 aptamer before and after adding 100 µg/L acetamidrid; (b) Effect of S-18 aptamer concentrations on the present aptasensor for acetamidrid detection. Error bars shown represent the standard error derived from three repeated measurements.

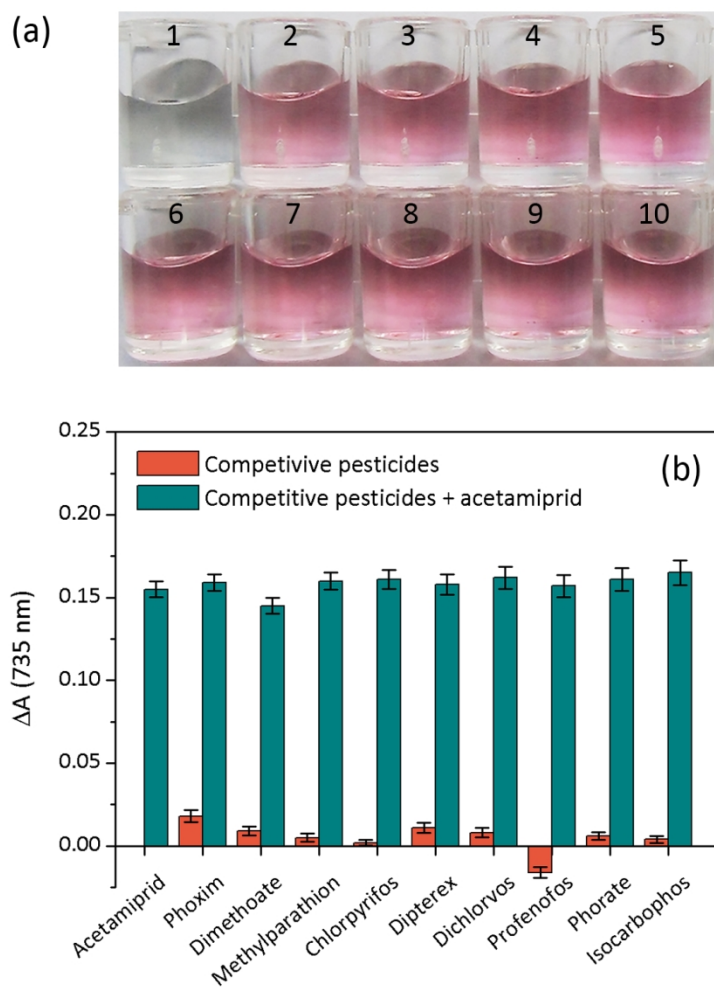

**Figure S5** (a) Visual color changes of the sensing solutions treated with various competitive pesticides. Samples 1-10 were acetamiprid, phoxim, dimethoate, methylparathion, chlorpyrifos, dipterex, dichlorvos, profenofos, phorate and isocarbofos, respectively. (b) Selectivity of present colorimetric aptasensor for acetamiprid detection in NaAc-HAc solutions. The concentrations of competitive pesticides and acetamiprid were 100  $\mu\text{g/L}$ .
